1 Dauer diapause has transgenerational effects on starvation survival and gene expression  
2 plasticity

3  
4 Amy K. Webster<sup>1,2</sup>, James M. Jordan<sup>1</sup>, Jonathan D. Hibshman<sup>1,2,3</sup>, Rojin Chitrakar<sup>1</sup> and L. Ryan  
5 Baugh<sup>1\*</sup>

6  
7 <sup>1</sup>Department of Biology, Duke University, Durham, NC, USA

8 <sup>2</sup>University Program in Genetics and Genomics, Duke University, Durham, NC, USA

9 <sup>3</sup>Current address: Department of Biology, University of North Carolina, Chapel Hill, NC, USA

10 Key words: Dauer, diapause, starvation, transgenerational, plasticity, epigenetic

11  
12 \*Corresponding author

13 L. Ryan Baugh

14 [ryan.baugh@duke.edu](mailto:ryan.baugh@duke.edu)

15 Department of Biology

16 Duke University

17 Box 90338

18 Durham, NC 27708

19 USA

20

21 **ABSTRACT**

22 Phenotypic plasticity is facilitated by epigenetic regulation, and remnants of such regulation may  
23 persist after plasticity-inducing cues are gone. However, the relationship between plasticity and  
24 transgenerational epigenetic memory is not understood. Dauer diapause in *Caenorhabditis*  
25 *elegans* provides an opportunity to determine how a plastic response to the early-life  
26 environment affects traits later in life and in subsequent generations. We report that after  
27 extended diapause, post-dauer worms initially exhibit reduced reproductive success and greater  
28 inter-individual variation. In contrast, F3 progeny of post-dauers display increased starvation  
29 resistance and lifespan, revealing potentially adaptive transgenerational effects.  
30 Transgenerational effects are dependent on the duration of diapause, indicating an effect of  
31 extended starvation. In agreement, RNA-seq demonstrates a transgenerational effect on  
32 nutrient-responsive genes. Further, post-dauer F3 progeny exhibit reduced gene expression  
33 plasticity, suggesting a trade-off between plasticity and epigenetic memory. This work reveals  
34 complex effects of nutrient stress over different time scales in an animal that evolved to thrive in  
35 feast and famine.

36           Epigenetic regulation mediates phenotypic plasticity, such that a single genotype can  
37 produce different phenotypes in response to environmental conditions (1). Most epigenetic  
38 modifications are reset at the beginning of each generation, but those that persist have the  
39 potential to impact environmental adaptation and evolution independent of DNA sequence (2-4).  
40 Consequently, there is substantial interest in identifying environmental perturbations that elicit  
41 transgenerational epigenetic effects. Epigenetic inheritance has been reported in the  
42 roundworm *Caenorhabditis elegans*, but these studies typically focus on an aphysiological  
43 stimulus, such as a mutation or exogenous RNAi trigger (5, 6), or they assay a molecular rather  
44 than organismal phenotype, such as gene expression (7-10). Consequently, the importance of  
45 epigenetic inheritance to environmental adaptation is unclear. Identification and characterization  
46 of plasticity-induced transgenerational effects manifest at the organismal level can address  
47 important questions. Do epigenetic changes in gene regulation affect organismal traits? Does  
48 epigenetic memory provide a predictive adaptive response that improves fitness? Alternatively,  
49 does epigenetic memory arise due to a failure to reset the epigenetic program between  
50 generations, potentially posing a fitness cost?

51           *C. elegans* has a variety of developmental responses to nutrient availability (11-14). In  
52 particular, larvae respond to specific environmental cues (high population density, low food  
53 availability, and high temperature) and undergo an alternative developmental program resulting  
54 in dauer arrest (15). Dauer arrest is a classic example of diapause since dauer larvae develop in  
55 response to cues perceived in advance of arrest (16). Dramatic morphological and gene  
56 regulatory changes occur during dauer development (17-19) under the regulation of highly  
57 conserved signaling pathways (20-24). Dauers have a thicker cuticle and plugged pharynx,  
58 supporting increased stress resistance but preventing feeding. Dauers also have an altered  
59 nervous system, gut, and muscles compared to non-dauers (25-27). They are provisioned with  
60 fat stores that aid survival during prolonged starvation (28, 29). If environmental conditions  
61 improve, larvae exit dauer arrest and ultimately become reproductive adults.

62 *C. elegans* collected from the wild are mostly in the dauer stage, providing evidence that  
63 starvation stress during dauer diapause is a common feature of their life history (30). Time spent  
64 in dauer does not alter the length of the adult lifespan, suggesting an "ageless" state (31).  
65 Nonetheless, dauer larvae do eventually die, with about one-third failing to recover at 60 days  
66 (31). Further, germline defects increase in frequency as the duration of dauer diapause  
67 increases (32), suggesting that at least some consequences of starvation incurred during  
68 diapause persist in post-dauers. It is currently unknown if effects of long-term dauer diapause  
69 persist upon recovery to affect important life-history traits, including progeny quality and  
70 starvation resistance. The consequences of long-term dauer diapause beyond one generation  
71 are, to our knowledge, completely unexplored.

72 Here, we report the consequences of long-term dauer diapause over multiple  
73 generations. We found that long-term dauers recovered to produce fewer, smaller and  
74 starvation-sensitive F1 progeny that exhibited greater inter-individual variation, suggesting  
75 proximal fitness costs. In contrast, great-grandprogeny (F3 generation) of long-term dauers  
76 exhibited increased starvation resistance and lifespan, consistent with potentially adaptive  
77 transgenerational effects. Increased starvation resistance was dependent on the time spent in  
78 the ancestral dauer diapause, suggesting that it is starvation during dauer, rather than dauer  
79 development itself, leading to these transgenerational effects. Consistent with this, we identified  
80 epigenetic differences in nutrient-responsive gene expression in the F3 generation including a  
81 dampened response to nutrient availability. These results indicate that ancestral environment  
82 can influence how worms respond to their current environment, and they suggest a trade-off  
83 between epigenetic memory and plasticity.

84

85

## 86 RESULTS

87 We carefully controlled worm population density and bacterial food concentration in a  
88 liquid culture system to cause wild-type worms to either enter dauer diapause or to bypass it  
89 (18) (Fig 1). Ancestors of dauer and control worms were well fed for multiple generations (>3)  
90 to control for multigenerational effects of starvation or dietary restriction. Long-term dauers  
91 remained dauers for 36-45 days, and then were put on plates with food to recover. In parallel,  
92 control worms that did not experience dauer were plated from liquid culture so that post-dauer  
93 and control worms were paired for experiments.

94

### 95 ***Long-term dauer diapause reduces reproductive success in the P0 generation***

96 We determined the proximal consequences of long-term dauer diapause on reproductive  
97 success. Following diapause, post-dauer worms recovered to produce fewer F1 progeny (Fig  
98 2A and Supplementary Fig 1A). Post-dauer adults also produced smaller embryos (Fig 2B and  
99 Supplementary Fig 1B). *C. elegans* embryos hatch as L1 larvae. In the absence of food, L1  
100 larvae survive starvation by remaining arrested as L1s, and this is reversible upon feeding.  
101 Survival during L1 arrest is a measure of starvation resistance (12). We found that post-dauers  
102 produced F1 progeny that were relatively sensitive to starvation by two metrics: L1 starvation  
103 survival (Fig 2C) and growth rate during recovery from L1 starvation (Fig 2D and Supplementary  
104 Fig 1C). Thus, long-term dauer arrest incurs costs to average fecundity as well as to progeny  
105 quality and starvation resistance, indicating reduced reproductive success.

106 Because we identified differences in *mean* trait values for post-dauer and control worms  
107 upon recovery and in the F1 generation, we also considered the possibility that experiencing  
108 long-term dauer diapause could alter the inter-individual *variation* of key traits within a worm  
109 population. We found that post-dauer worms exhibited greater variation in brood size than  
110 controls, and that F1 embryos were more variable in length (Supplementary Fig 2A-B).  
111 Consistent with these observations, once these embryos hatched as L1s, they appeared to

112 exhibit greater variation in body length after recovery from 8 days of starvation, but not 1 day of  
113 starvation (Supplementary Fig 2C). This suggests that increased inter-individual variation is  
114 uncovered by the stress of extended L1 starvation. Together our results suggest that the  
115 proximal consequences of long-term diapause include decreased reproductive success and  
116 increased phenotypic variation.

117

118 ***Long-term dauer diapause increases starvation resistance and lifespan***  
119 ***transgenerationally***

120 We asked whether effects of long-term dauer diapause persisted beyond the F1  
121 generation to the F3 generation. Persistence to the F3 generation suggests transgenerational  
122 epigenetic inheritance, while effects in the F1 and F2 generations could be due to maternal  
123 effects (33). We measured starvation resistance in three ways: L1 starvation survival, body  
124 length following 48 hours of recovery from L1 starvation, and brood size following recovery from  
125 L1 starvation. In contrast to F1 L1 larvae, we found that F3 progeny of long-term dauers  
126 exhibited increased L1 starvation survival (Fig 3A). Likewise, F3 progeny of long-term dauers  
127 allowed to recover for 48 hr from 8 days of L1 starvation were larger than controls recovering  
128 from 8 days of L1 starvation, demonstrating increased growth rate (Fig 3B and Supplementary  
129 Fig 3A). In addition, the broods of F3 progeny of long-term dauers following 8 days of L1  
130 starvation were larger than the broods of F3 controls following 8 days of L1 starvation (Fig 3C  
131 and Supplementary Fig 3B). We also assayed growth rate and brood size in the F3 post-dauers  
132 with just 1 day of L1 starvation and found no significant differences in these traits (Fig 3B-C and  
133 Supplementary Fig 3A-B). In addition, we did not find evidence of differences in inter-individual  
134 variation in the F3 generation (Supplementary Fig 3F-G), suggesting that the differences in  
135 mean trait values in the F3 generation were not due to a difference in the shape of the  
136 underlying trait distribution. Together these data support the conclusion that long-term dauer  
137 diapause leads to epigenetic inheritance of increased starvation resistance in F3 progeny.

138 We found transgenerational effects of long-term dauer arrest that were present beyond  
139 the L1 stage and into adulthood in F3 worms that were never starved. F3 progeny of long-term  
140 dauers lived longer as adults than controls (Fig 4D, Supplementary Fig 3C-E), demonstrating  
141 that there are transgenerational consequences of long-term dauer diapause outside the context  
142 of starvation.

143 We next wanted to determine whether the transgenerational increase in starvation  
144 resistance depends on the duration of dauer diapause. When worms were dauers for just six  
145 days, F3 progeny of these short-term dauers did not exhibit differences in starvation survival or  
146 brood size following starvation (Supplementary Fig 4). We had the statistical power to detect  
147 differences in starvation survival of less than a day (Supplementary Table 1; power analysis not  
148 shown). This suggests that the transgenerational effects of experiencing long-term dauer arrest  
149 are dependent on the length of starvation during arrest as opposed to the dauer-inducing culture  
150 conditions, dauer formation, or dauer recovery.

151

### 152 ***Epigenetic memory of dauer diapause affects gene expression globally***

153 Transgenerational effects of long-term dauer diapause on important organismal traits  
154 suggest epigenetic regulation of gene expression. We used mRNA-seq to determine if gene  
155 expression patterns in both fed and starved F3 progeny of controls, short-term dauers, and  
156 long-term dauers differed (Fig 4A). This two-factor design allowed us to analyze both  
157 transgenerational and instantaneous effects of nutrient availability on gene expression. We  
158 performed principal component analysis (PCA) on the normalized mean counts per million  
159 (CPM) values for six conditions as well as on individual biological replicates (Fig 4B,  
160 Supplementary Fig 5). PC1 separated condition means depending on whether the worms were  
161 fed or starved as F3 L1s, while PC2 separated them according to length of time the initial  
162 generation spent in dauer diapause. Notably, instantaneous effects of nutrient availability (PC1)  
163 appeared to explain substantially greater variance in gene expression than epigenetic effects

164 (PC2). Nonetheless, these results suggest that ancestral environmental conditions play a small,  
165 but detectable, role in shaping gene expression in the F3 generation.

166 We compared gene expression plasticity in F3 long-term post-dauers to controls. That is,  
167 we assessed gene expression differences between starved and fed F3 worms with long-term  
168 dauer ancestors to starved and fed F3 worms with control ancestors (Fig 5A). Regardless of  
169 ancestral background, starved and fed worms exhibited dramatic gene expression differences  
170 (Fig 5A, Supplementary File 1), consistent with PC1. Gene expression responses to nutrient  
171 availability were also highly correlated. Notably, virtually no genes had large differences in one  
172 comparison and not the other. However, the slope of the linear regression was significantly less  
173 than 1, suggesting that gene expression plasticity in response to nutrient availability in the F3  
174 generation following long-term dauer diapause is dampened relative to controls.

175 Dampened plasticity could occur if fed F3 progeny of long-term dauers had a  
176 transcriptional profile that appeared “less fed” compared to fed controls or if starved F3 progeny  
177 of long-term dauers appeared transcriptionally “less starved” compared to starved controls.  
178 First, we found fed F3 progeny of long-term dauers appeared less fed (or, equivalently, more  
179 starved) relative to fed controls by comparing the effect of plasticity in controls to the epigenetic  
180 effect in fed larvae (Fig 5B,C). We further tested this effect using the most differentially  
181 expressed nutrient-responsive genes. These genes, highlighted in Fig 5B, showed that genes  
182 that were significantly up- or down-regulated in starved worms compared to fed worms tend to  
183 also be up- or down-regulated, respectively, in fed F3 progeny of long-term dauers relative to  
184 fed controls (Figs 5B,C). We also found that the regulatory targets of the transcription factor *daf-*  
185 *16* (34), which promotes starvation survival (12), overlap with the nutrient-responsive genes  
186 and display a similar epigenetic effect of long-term dauer diapause (Fig 5D, Supplementary Fig  
187 6A). This result corroborates the epigenetic effect on nutrient-responsive genes using gene lists  
188 defined outside the context of this study. These results provide evidence that dampened gene



189 expression plasticity is driven at least in part by differences in nutrient-responsive gene  
190 expression in fed F3 progeny of long-term dauers.

191 We wanted to determine whether there are differences in nutrient-responsive gene  
192 expression in the *starved* F3 progeny of long-term dauers compared to controls. In contrast to  
193 the fed F3 progeny, the starved F3 progeny of long-term dauers exhibited a negative correlation  
194 with the control nutrient response (Fig 5E,F). This was corroborated by the fact that *daf-16*  
195 target genes displayed similar behavior (Fig 5G). Together these results suggest that there are  
196 transgenerational effects on gene expression in both fed and starved F3 larvae that collectively  
197 contribute to reduced gene expression plasticity.

198 F3 progeny of short-term dauers did not display detectable epigenetic effects on  
199 starvation resistance, but we did detect effects on gene expression. We found that F3 progeny  
200 of short-term dauers showed similar transcriptional changes as identified in the F3 progeny of  
201 long-term dauers, including dampening of nutrient-responsive gene expression (Fig 5H,  
202 Supplementary Fig 6B-D). However, transgenerational changes in gene expression following  
203 short-term dauer appear to be less consistent and possibly of a smaller magnitude than those  
204 elicited by long-term dauer. PC2 aligns means of short-term dauer samples between control and  
205 long-term dauer samples (Fig 4A). The slope of the dampening response of F3 progeny of  
206 short-term dauers compared to controls was closer to 1 than F3 progeny of long-term dauers,  
207 and F3 progeny of long-term dauers exhibit dampening relative to short-term dauers (Fig 5H,  
208 Supplementary Fig 6B). In addition, we examined gene expression shifts within individual paired  
209 replicates (replicates in which an F3 dauer sample was collected in parallel with a control). All  
210 paired replicates for starved F3 progeny of long-term dauers compared to starved controls  
211 showed shifts in nutrient-responsive genes in the expected direction (Supplementary Fig 6E).  
212 Paired replicates for F3 progeny of short-term dauers exhibited shifts in gene expression for the  
213 majority, but not all, pairs (Supplementary Fig 6F). Collectively, these results suggest that  
214 transgenerational epigenetic effects of short-term dauer are detectable and qualitatively similar

215 to those of long-term dauer, but that they are less consistent, likely accounting for lack of  
216 detectable effects on starvation resistance.

217

## 218 **DISCUSSION**

219 We utilized a well-studied model of phenotypic plasticity, dauer diapause, to interrogate  
220 the proximal and transgenerational consequences of early-life environment on organismal traits  
221 and gene expression. Post-dauer worms displayed reduced reproductive success after long-  
222 term diapause, but their F3 progeny exhibited increased starvation resistance and lifespan. F3  
223 progeny of both short- and long-term dauers exhibited changes in gene expression in nutrient-  
224 responsive genes, consistent with a reduction in gene expression plasticity in response to  
225 nutrient availability. This work has broad implications for understanding the consequences of  
226 starvation, including the potential for epigenetic inheritance in response to nutrient availability  
227 and potentially adaptive responses across generations.

228 Long-term dauers recovered to produce fewer, smaller F1 progeny that are starvation  
229 sensitive compared to worms that do not enter dauer. We also found that long-term post-dauers  
230 exhibit increased inter-individual variation, consistent with developmental decanalization (35)  
231 stemming from deleterious effects of extended starvation (See Supplementary Discussion).  
232 Dauer diapause is evolutionarily adaptive, as it allows worms to survive conditions that would  
233 otherwise be lethal. Our results suggest that while it is adaptive to be able to enter dauer to  
234 survive adverse conditions, there is a cost to extended dauer diapause. The proximal costs of  
235 long-term dauer diapause are consistent with our lab's previous work identifying costs to eight  
236 days of L1 starvation, as worms recovered from L1 starvation are more sensitive to subsequent  
237 starvation and produce smaller broods with decreased progeny quality (36). Both extended L1  
238 starvation and dauer diapause appear costly, but this is likely due to the costs of starvation  
239 experienced during these states, rather than simply arresting development. Post-dauer worms  
240 that experienced dauer for just one day live longer and produce larger broods (37). Together

241 these observations suggest that hormesis, in which a mild stress can increase fitness (38), may  
242 occur when starvation is brief, but that extended starvation is costly as the buffering capacity of  
243 the organism is overwhelmed.

244 We found that the F3 progeny of long-term dauers exhibit increased starvation  
245 resistance as larvae and live longer as fed adults, indicating that transgenerational effects  
246 manifest in both fed and starved animals and that they persist through the life cycle.  
247 Multigenerational consequences of L1 starvation have been previously examined and exhibit  
248 some similarities to those of long-term dauer diapause. Following 8 days of L1 starvation, we  
249 previously observed increased starvation resistance in the F2 but not F3 generation (36). We  
250 did not detect a reproducible effect on lifespan following L1 starvation in any generation, though  
251 increased lifespan in the F3 generation following L1 starvation has been reported in another  
252 study (39). Notably, transmission of increased starvation resistance to F1 and F2 progeny of  
253 worms that experienced L1 starvation required sorting larvae by size after 2 days of recovery  
254 from starvation (36), and in the present study such sorting was not required. Still, both L1 and  
255 dauer starvation paradigms reveal apparent proximal fitness costs of extended starvation  
256 followed by potentially adaptive increases in starvation resistance in subsequent generations.  
257 The switch from proximal starvation sensitivity to heritable starvation resistance in both  
258 paradigms is of particular interest.

259 In addition to life-history trait differences, we identified transgenerational effects of dauer  
260 diapause on gene expression plasticity in response to nutrient availability. Specifically, we found  
261 that F3 progeny of both short-term and long-term dauers exhibited reduced gene expression  
262 plasticity, with starved F3 worms appearing less starved and fed F3 worms appearing less fed.  
263 Theory suggests that there should be costs and limits to plasticity, though there are relatively  
264 few empirical examples of such costs (40, 41). While we emphasize that the transgenerational  
265 effect on gene expression plasticity does not necessarily indicate plasticity at other levels of  
266 regulation, one interpretation of this result is that maintaining an epigenetic memory of ancestral

267 environmental conditions limits plastic responses to current environmental conditions. In other  
268 words, there is hypothetically a fixed capacity to respond to environmental conditions, but this  
269 capacity can be exhausted by instantaneous and epigenetic regulation.

270         It is possible that subtle changes in starvation resistance and gene expression reflect  
271 physiological fine-tuning in anticipation of future conditions based on ancestral history. In  
272 contrast, it is possible that epigenetic memory of ancestral conditions occurs but is not  
273 necessarily adaptive, as a potentially neutral or even costly by-product of some of other  
274 selected trait. Epigenetic stability from parent to offspring is favorable given that four conditions  
275 are met: 1) the environment is variable; 2) parental environment has some predictive power  
276 over offspring environment; 3) transgenerational effects increase fitness of parents and/or  
277 offspring; and 4) costs associated with the transgenerational response are low (42). Though it is  
278 clear that *C. elegans* experience variable nutrient conditions in the wild (43), it is currently  
279 unknown how predictive parental environment is of offspring environment over multiple  
280 generations. Here, we find that F3 progeny of long-term dauers are more starvation resistant,  
281 and this is not accompanied by detectable costs in growth or fecundity, consistent with the  
282 possibility that this transgenerational effect is adaptive. Recognizing that it is ultimately difficult  
283 to determine if such a complex trait as epigenetic inheritance is evolutionarily adaptive, we hope  
284 that future studies in the context of the natural ecology of *C. elegans* will shed light on this  
285 question.

286

## 287 **MATERIALS AND METHODS**

### 288 ***Dauer and control cultures***

289         The wild-type strain N2 was used for all experiments. N2 was obtained from the  
290 Sternberg collection at the California Institute of Technology, originally from the CGC in 1987.  
291 Worms were maintained for at least 3 generations in standard laboratory conditions without  
292 starving prior to beginning experiments. ~10 adults were picked onto each of 4-5 10 cm NGM

293 plates seeded with *E. coli* OP50 and maintained at 20°C. Embryos were obtained by standard  
294 hypochlorite treatment after four days in culture. For dauer-forming conditions, embryos were  
295 suspended in S-complete at a density of 5 per microliter with 1 mg/mL *E. coli* HB101(18).  
296 HB101 was prepared as described previously (44). For control conditions, embryos were  
297 suspended at 1 per microliter with 38 mg/ml HB101. Worms were cultured at 180 rpm and 20°C  
298 in 25 mL glass Erlenmeyer flasks in a volume of 5 mL (25,000 worms for dauer conditions and  
299 5,000 for control conditions). For experiments that required greater than 5,000 control worms, a  
300 20 mL volume in a 250 mL Erlenmeyer flask with the same density and food concentration was  
301 used. Dauer formation occurs in approximately 4 days with nearly 100% penetrance. Short-term  
302 dauers remained in culture for 10 days, being arrested as dauers for 6 days. Long-term dauers  
303 remained in culture for 40-49 days, being arrested as dauers for 36-45 days. Survival was 90 -  
304 100% in long-term dauer cultures. Control worms were in culture for 40-44 hours and were  
305 plated as L4 larvae. The L4 stage was chosen because dauers recover to become L4 larvae.

306

### 307 ***Dauer recovery and maintenance***

308 Dauer and control conditions were paired such that control cultures were set up to be  
309 recovered at the same time as the dauer culture. Thus, recovery, maintenance, sampling and  
310 assaying were done in parallel. Worms were taken from liquid cultures and plated on 10 cm  
311 NGM plates seeded with OP50 and incubated at 20°C. To obtain F1 progeny, approximately  
312 1000 P0 worms were plated per seeded plate, and these were hypochlorite treated 2 days later  
313 to obtain F1 progeny for analysis. To obtain F3 progeny, 10 P0 worms were plated per seeded  
314 plate. These worms laid F1 embryos, which grew to become gravid adults on the same plates  
315 (~1000 F1 worms per plate). Five days after plating, the F1 worms on these plates were  
316 hypochlorite treated to obtain F2 embryos. Approximately 1000 F2 embryos were plated per  
317 new seeded plate, and these worms were hypochlorite treated 3 days later to obtain F3  
318 progeny. In all cases, hypochlorite treatment was performed prior to worms starving on plates.

319 ***L1 starvation survival***

320 Embryos were suspended following hypochlorite treatment in virgin S-basal (no  
321 cholesterol or ethanol) at a density of 1 embryo/ $\mu$ L in a volume of 5 mL in a 16 mm glass test  
322 tube and placed on a tissue culture roller drum at approximately 25 rpm and 21-22°C. Beginning  
323 at day 1 (24 hr after hypochlorite treatment) and continuing every other day, a 100  $\mu$ L sample  
324 was taken and plated on a 6 cm NGM plate with a spot of OP50 in the center. The sample was  
325 plated to the side of the OP50. The number of worms plated was scored (total plated =  $T_P$ ). Two  
326 days later, the number of worms that were alive on the plate were scored (total alive =  $T_A$ ). The  
327 proportion alive at each time point was calculated as  $T_A / T_P$ .

328

329 ***Brood size***

330 Worms were singled onto 6 cm NGM plates with OP50 as L4 larvae. Worms were  
331 transferred to new plates each day until they stopped producing progeny. The number of  
332 progeny per plate was scored 2 days after removal of the mother. The total brood size per worm  
333 was determined by summing the progeny per plate across all plates for a single worm. Worms  
334 were censored if they died during egg laying. This affected 11 worms total in P0 brood size (5  
335 post-dauers, 6 controls). In the F3 generation following long-term dauer, for 0 days of arrest,  
336 number of worms that died during egg laying included 0 controls and 1 post-dauer. For 8 days  
337 of arrest, number of worms that died during egg laying include 16 controls and 14 post-dauers;  
338 2 controls and 2 post-dauers were sterile. In the F3 generation following short-term dauer, 9  
339 control worms and 9 post-dauer worms died during egg laying; 1 post-dauer worm was sterile.

340

341 ***Embryo length***

342 Embryos were plated onto unseeded 10 cm NGM plates. Embryos were imaged with a  
343 Zeiss Discovery. V20 stereomicroscope with a 10x objective (KSC 190-975). The images were  
344 analyzed with FIJI as described previously (44). Lengths of embryos were measured by

345 thresholding embryos and calculating the long axis from ellipse fitting. The background was  
346 subtracted, images were thresholded, converted to binary, holes were filled, and particles were  
347 analyzed. Analysis was done in batch and the results were manually curated to ensure only  
348 quality embryo images were included.

349

### 350 ***Worm length***

351 L1 larvae that had been starved for 1 or 8 days were recovered by plating on 10 cm  
352 NGM plates with OP50 as previously described (44). After 48 hours of recovery, worms were  
353 washed off the plates with virgin S-basal and plated on unseeded 10 cm NGM plates for  
354 imaging. Images were taken on a ZeissDiscovery.V20 stereomicroscope with automated zoom.  
355 Images were analyzed with the WormSizer plugin for FIJI to determine worm length and  
356 manually passed or failed (45).

357

### 358 ***Lifespan***

359 For each condition and replicate, 150 L1 larvae arrested for 1 day in virgin S-basal were  
360 plated on 6 cm NGM plates seeded with OP50. After two days, 72 worms were randomly picked  
361 onto new seeded plates in groups of 12. Adults were picked away from their progeny onto fresh  
362 plates every day until egg laying ceased. Worms that responded to gentle prodding with a  
363 platinum wire were transferred to fresh plates every 2 - 3 days. Worms were considered dead  
364 when they failed to respond to prodding. Worms that crawled off the agar were considered lost  
365 and subtracted from the total  $n$ . No other animals were censored. Lifespan curves were  
366 analyzed to determine mean survival using OASIS (46).

367

### 368 ***Statistical analysis***

369 Statistics were calculated in R or Microsoft Excel. To test for differences in means  
370 across groups, linear mixed effect models were fit to the data using the “nlme” package in R.

371 The summary function was used to calculate p-values for the models, which implements the  
372 Wald test. Fixed effects included condition (post-dauer vs. control) and, where applicable, length  
373 of starvation (0 or 1 day vs. 8 days). An interaction term was included for experiments with both  
374 types of fixed effects. A random effect of biological replicate was included for all models. To test  
375 for differences in inter-individual variation across conditions, data were mean normalized within  
376 each biological replicate and condition, individual worms across all replicates were pooled, and  
377 Levene's test was used to assess homogeneity of variance across conditions. For starvation  
378 survival (Figs 2,4, and 5), logistic curves were fit to survival data and median survival times  
379 were calculated (47). Paired t-tests were performed on median survival times. Statistical tests  
380 and significance are indicated in figure legends. Plots were generated using ggplot2 in R.

381

### 382 ***Sample collection for RNA-seq***

383 F3 embryos were suspended at 1 embryo/ $\mu$ L in S-complete either with or without 25  
384 mg/mL HB101 to obtain fed or starved L1s, respectively. At least 10,000 embryos were used  
385 per condition per replicate. Fed larvae were collected 18 hr after hypochlorite treatment as  
386 early-stage developing L1 larvae. Starved larvae were collected 24 hr after hypochlorite  
387 treatment as arrested L1 larvae that had hatched approximately 12 hr earlier. To collect starved  
388 samples, cultures were transferred to 15 mL conical tubes and spun for 1 minute at 3000 rpm.  
389 Liquid was aspirated to < 100  $\mu$ L containing the worm pellet. Worms were washed 0-1X with S-  
390 basal. The worm pellet was transferred to a 1.5 mL microcentrifuge tube, flash frozen in liquid  
391 nitrogen, and stored at -80°C until RNA isolation. To collect fed samples, cultures were  
392 transferred to 15 mL conical tubes and spun at 3000 rpm for 10 seconds. Liquid was aspirated  
393 to < 100  $\mu$ L containing the worm pellet. The pellet was quickly washed 3-4X with 10 mL S-basal,  
394 visually inspected to ensure removal of the vast majority of bacteria, transferred to a 1.5 mL  
395 microcentrifuge tube, flash frozen, and stored at -80°C until RNA isolation.

396



397 ***RNA isolation and library preparation***

398 RNA was isolated using TRIzol (Invitrogen) using the manufacturer's protocol with minor  
399 modifications. 1 mL of TRIzol was used per sample along with 100  $\mu$ L of acid-washed sand.  
400 mRNA-seq libraries were prepared using the NEBNext Ultra RNA Library Prep Kit for Illumina  
401 (E7530) in two batches, utilizing either 500 or 100 ng of starting RNA per library and 12 or 15  
402 PCR cycles, respectively. Libraries were sequenced using Illumina HiSeq 4000 to obtain single-  
403 end 50 bp reads.

404

405 ***RNA-seq analysis***

406 Bowtie was used to map reads to the WS210 genome (48). We also included transcripts  
407 annotated in WS220 mapped back to the WS210 genome coordinates, as described previously  
408 (49). Mapping efficiencies ranged from 81-86% for all libraries. HTSeq was used to generate  
409 count tables for each library (50). Count tables were analyzed for differential expression using  
410 the edgeR package in R, which utilizes a negative binomial model to estimate dispersions (51).  
411 Detected genes were considered those expressed at a level of at least 4 counts per million  
412 (CPM) across all libraries for all conditions, reducing the number of genes included in the  
413 analysis to 8649. The "calcNormFactors" function was used to normalize for RNA composition  
414 and the tagwise dispersion estimate was used for differential expression. The exact test was  
415 used for pairwise comparisons. Log<sub>2</sub> fold change estimates from differential expression analysis  
416 in edgeR were used for generating plots in Fig 7 and Supplementary Fig 4. Kolmogorov-  
417 Smirnov tests were used to determine differences in cumulative distributions of log<sub>2</sub> fold  
418 changes.

419

420 ***Data availability***

421 Raw and processed RNA-seq data is available through the GEO NCBI database with accession  
422 number GSE113500.

423 **REFERENCES**

- 424 1. Kelly SA, Panhuis TM, Stoehr AM. Phenotypic plasticity: molecular mechanisms and  
425 adaptive significance. *Compr Physiol*. 2012;2(2):1417-39.
- 426 2. Rapp RA, Wendel JF. Epigenetics and plant evolution. *New Phytol*. 2005;168(1):81-91.
- 427 3. Heard E, Martienssen RA. Transgenerational epigenetic inheritance: myths and  
428 mechanisms. *Cell*. 2014;157(1):95-109.
- 429 4. Jablonka E, Raz G. Transgenerational epigenetic inheritance: prevalence, mechanisms,  
430 and implications for the study of heredity and evolution. *Q Rev Biol*. 2009;84(2):131-76.
- 431 5. Greer EL, Maures TJ, Ucar D, Hauswirth AG, Mancini E, Lim JP, et al. Transgenerational  
432 epigenetic inheritance of longevity in *Caenorhabditis elegans*. *Nature*. 2011;479(7373):365-71.
- 433 6. Buckley BA, Burkhart KB, Gu SG, Spracklin G, Kershner A, Fritz H, et al. A nuclear  
434 Argonaute promotes multigenerational epigenetic inheritance and germline immortality.  
435 *Nature*. 2012;489(7416):447-51.
- 436 7. Schott D, Yanai I, Hunter CP. Natural RNA interference directs a heritable response to  
437 the environment. *Sci Rep*. 2014;4:7387.
- 438 8. Ni JZ, Kalinava N, Chen E, Huang A, Trinh T, Gu SG. A transgenerational role of the  
439 germline nuclear RNAi pathway in repressing heat stress-induced transcriptional activation in *C.*  
440 *elegans*. *Epigenetics Chromatin*. 2016;9:3.
- 441 9. Minkina O, Hunter CP. Stable Heritable Germline Silencing Directs Somatic Silencing at  
442 an Endogenous Locus. *Molecular cell*. 2017;65(4):659-70 e5.
- 443 10. Klosin A, Casas E, Hidalgo-Carcedo C, Vavouri T, Lehner B. Transgenerational  
444 transmission of environmental information in *C. elegans*. *Science*. 2017;356(6335):320-3.
- 445 11. Schindler AJ, Baugh LR, Sherwood DR. Identification of late larval stage developmental  
446 checkpoints in *Caenorhabditis elegans* regulated by insulin/IGF and steroid hormone signaling  
447 pathways. *PLoS Genet*. 2014;10(6):e1004426.
- 448 12. Baugh LR. To grow or not to grow: nutritional control of development during  
449 *Caenorhabditis elegans* L1 arrest. *Genetics*. 2013;194(3):539-55.
- 450 13. Angelo G, Van Gilst MR. Starvation protects germline stem cells and extends  
451 reproductive longevity in *C. elegans*. *Science*. 2009;326(5955):954-8.
- 452 14. Schulenburg H, Felix MA. The Natural Biotic Environment of *Caenorhabditis elegans*.  
453 *Genetics*. 2017;206(1):55-86.
- 454 15. Hu PJ. Dauer. *WormBook*. 2007:1-19.
- 455 16. Kostal V. Eco-physiological phases of insect diapause. *J Insect Physiol*. 2006;52(2):113-  
456 27.
- 457 17. Wang J, Kim SK. Global analysis of dauer gene expression in *Caenorhabditis elegans*.  
458 *Development*. 2003;130(8):1621-34.
- 459 18. Baugh LR, Kurhanewicz N, Sternberg PW. Sensitive and precise quantification of insulin-  
460 like mRNA expression in *Caenorhabditis elegans*. *PLoS One*. 2011;6(3):e18086.
- 461 19. McElwee JJ, Schuster E, Blanc E, Thomas JH, Gems D. Shared transcriptional signature in  
462 *Caenorhabditis elegans* Dauer larvae and long-lived *daf-2* mutants implicates detoxification  
463 system in longevity assurance. *J Biol Chem*. 2004;279(43):44533-43.
- 464 20. Fielenbach N, Antebi A. *C. elegans* dauer formation and the molecular basis of plasticity.  
465 *Genes Dev*. 2008;22(16):2149-65.

- 466 21. Li W, Kennedy SG, Ruvkun G. *daf-28* encodes a *C. elegans* insulin superfamily member  
467 that is regulated by environmental cues and acts in the DAF-2 signaling pathway. *Genes Dev.*  
468 2003;17(7):844-58.
- 469 22. Ren P, Lim CS, Johnsen R, Albert PS, Pilgrim D, Riddle DL. Control of *C. elegans* larval  
470 development by neuronal expression of a TGF-beta homolog. *Science.* 1996;274(5291):1389-91.
- 471 23. Schackwitz WS, Inoue T, Thomas JH. Chemosensory neurons function in parallel to  
472 mediate a pheromone response in *C. elegans*. *Neuron.* 1996;17(4):719-28.
- 473 24. Bargmann CI. Chemosensation in *C. elegans*. *WormBook.* 2006:1-29.
- 474 25. Dixon SJ, Alexander M, Chan KK, Roy PJ. Insulin-like signaling negatively regulates  
475 muscle arm extension through DAF-12 in *Caenorhabditis elegans*. *Dev Biol.* 2008;318(1):153-61.
- 476 26. Albert PS, Riddle DL. Developmental alterations in sensory neuroanatomy of the  
477 *Caenorhabditis elegans* dauer larva. *J Comp Neurol.* 1983;219(4):461-81.
- 478 27. Keane J, Avery L. Mechanosensory inputs influence *Caenorhabditis elegans* pharyngeal  
479 activity via ivermectin sensitivity genes. *Genetics.* 2003;164(1):153-62.
- 480 28. Cunningham KA, Ashrafi K. Fat rationing in dauer times. *Cell Metab.* 2009;9(2):113-4.
- 481 29. Narbonne P, Roy R. *Caenorhabditis elegans* dauers need LKB1/AMPK to ration lipid  
482 reserves and ensure long-term survival. *Nature.* 2009;457(7226):210-4.
- 483 30. Barriere A, Felix MA. High local genetic diversity and low outcrossing rate in  
484 *Caenorhabditis elegans* natural populations. *Curr Biol.* 2005;15(13):1176-84.
- 485 31. Klass M, Hirsh D. Non-ageing developmental variant of *Caenorhabditis elegans*. *Nature.*  
486 1976;260(5551):523-5.
- 487 32. Kim S, Paik YK. Developmental and reproductive consequences of prolonged non-aging  
488 dauer in *Caenorhabditis elegans*. *Biochem Biophys Res Commun.* 2008;368(3):588-92.
- 489 33. Skinner MK. What is an epigenetic transgenerational phenotype? F3 or F2. *Reprod*  
490 *Toxicol.* 2008;25(1):2-6.
- 491 34. Tepper RG, Ashraf J, Kaletsky R, Kleemann G, Murphy CT, Bussemaker HJ. PQM-1  
492 complements DAF-16 as a key transcriptional regulator of DAF-2-mediated development and  
493 longevity. *Cell.* 2013;154(3):676-90.
- 494 35. Chen J, Nolte V, Schlotterer C. Temperature stress mediates decanalization and  
495 dominance of gene expression in *Drosophila melanogaster*. *PLoS Genet.* 2015;11(2):e1004883.
- 496 36. Jobson MA, Jordan JM, Sandrof MA, Hibshman JD, Lennox AL, Baugh LR.  
497 Transgenerational Effects of Early Life Starvation on Growth, Reproduction, and Stress  
498 Resistance in *Caenorhabditis elegans*. *Genetics.* 2015;201(1):201-12.
- 499 37. Hall SE, Beverly M, Russ C, Nusbaum C, Sengupta P. A cellular memory of developmental  
500 history generates phenotypic diversity in *C. elegans*. *Curr Biol.* 2010;20(2):149-55.
- 501 38. Calabrese EJ, Baldwin LA. Defining hormesis. *Hum Exp Toxicol.* 2002;21(2):91-7.
- 502 39. Rechavi O, Houri-Ze'evi L, Anava S, Goh WS, Kerk SY, Hannon GJ, et al. Starvation-  
503 induced transgenerational inheritance of small RNAs in *C. elegans*. *Cell.* 2014;158(2):277-87.
- 504 40. Murren CJ, Auld JR, Callahan H, Ghalambor CK, Handelsman CA, Heskell MA, et al.  
505 Constraints on the evolution of phenotypic plasticity: limits and costs of phenotype and  
506 plasticity. *Heredity (Edinb).* 2015;115(4):293-301.
- 507 41. Dewitt TJ, Sih A, Wilson DS. Costs and limits of phenotypic plasticity. *Trends Ecol Evol.*  
508 1998;13(2):77-81.

- 509 42. Herman JJ, Spencer HG, Donohue K, Sultan SE. How stable 'should' epigenetic  
510 modifications be? Insights from adaptive plasticity and bet hedging. *Evolution*. 2014;68(3):632-  
511 43.
- 512 43. Felix MA, Braendle C. The natural history of *Caenorhabditis elegans*. *Curr Biol*.  
513 2010;20(22):R965-9.
- 514 44. Hibshman JD, Hung A, Baugh LR. Maternal Diet and Insulin-Like Signaling Control  
515 Intergenerational Plasticity of Progeny Size and Starvation Resistance. *PLoS Genet*.  
516 2016;12(10):e1006396.
- 517 45. Moore BT, Jordan JM, Baugh LR. WormSizer: high-throughput analysis of nematode size  
518 and shape. *PLoS One*. 2013;8(2):e57142.
- 519 46. Yang JS, Nam HJ, Seo M, Han SK, Choi Y, Nam HG, et al. OASIS: online application for the  
520 survival analysis of lifespan assays performed in aging research. *PLoS One*. 2011;6(8):e23525.
- 521 47. Kaplan RE, Chen Y, Moore BT, Jordan JM, Maxwell CS, Schindler AJ, et al. *dbl-1*/TGF-beta  
522 and *daf-12*/NHR Signaling Mediate Cell-Nonautonomous Effects of *daf-16*/FOXO on Starvation-  
523 Induced Developmental Arrest. *PLoS Genet*. 2015;11(12):e1005731.
- 524 48. Langmead B, Trapnell C, Pop M, Salzberg SL. Ultrafast and memory-efficient alignment  
525 of short DNA sequences to the human genome. *Genome Biol*. 2009;10(3):R25.
- 526 49. Maxwell CS, Antoshechkin I, Kurhanewicz N, Belsky JA, Baugh LR. Nutritional control of  
527 mRNA isoform expression during developmental arrest and recovery in *C. elegans*. *Genome*  
528 *Res*. 2012;22(10):1920-9.
- 529 50. Anders S, Pyl PT, Huber W. HTSeq--a Python framework to work with high-throughput  
530 sequencing data. *Bioinformatics*. 2015;31(2):166-9.
- 531 51. Robinson MD, McCarthy DJ, Smyth GK. edgeR: a Bioconductor package for differential  
532 expression analysis of digital gene expression data. *Bioinformatics*. 2010;26(1):139-40.
- 533 52. Waddington CH. The strategy of the genes; a discussion of some aspects of theoretical  
534 biology. London,: Allen & Unwin; 1957. ix, 262 p. p.
- 535 53. Starrfelt J, Kokko H. Bet-hedging--a triple trade-off between means, variances and  
536 correlations. *Biol Rev Camb Philos Soc*. 2012;87(3):742-55.  
537  
538

539 **FIGURES**

540

541

Figure 1. Schematic of experimental design

542

543

544

545

546

547

548

549

550

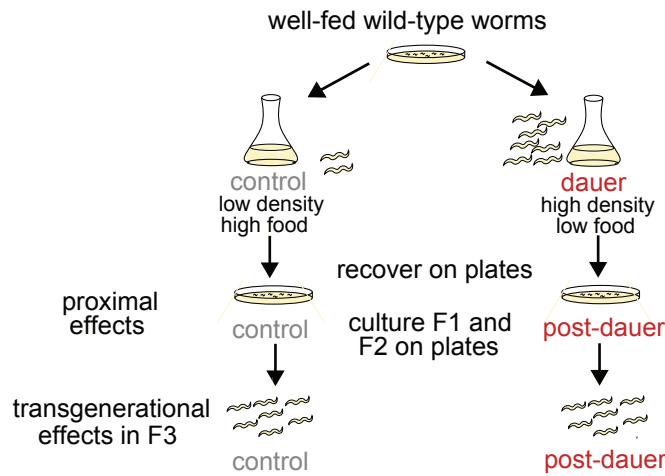

**Fig 1: Schematic of experimental design.** Well-fed, wild-type worms were hypochlorite treated as gravid adults to obtain embryos, which were placed in dauer or control conditions. For long-term dauer conditions, worms remained in culture for 40-49 days and were dauers for 36-45 days. Worms from dauer and control cultures were plated on food in parallel. These lay F1 progeny, some of which were used for experiments of proximal effects of long-term dauer diapause. Other F1 adults were hypochlorite treated to obtain F2 embryos. F2 adults were hypochlorite treated to obtain F3 embryos. F3 post-dauer and control worms were used for experiments.

551  
552  
553  
554  
555  
556  
557  
558  
559  
560  
561  
562  
563

Figure 2: Long-term dauers recover to produce fewer, smaller F1 progeny that are starvation sensitive

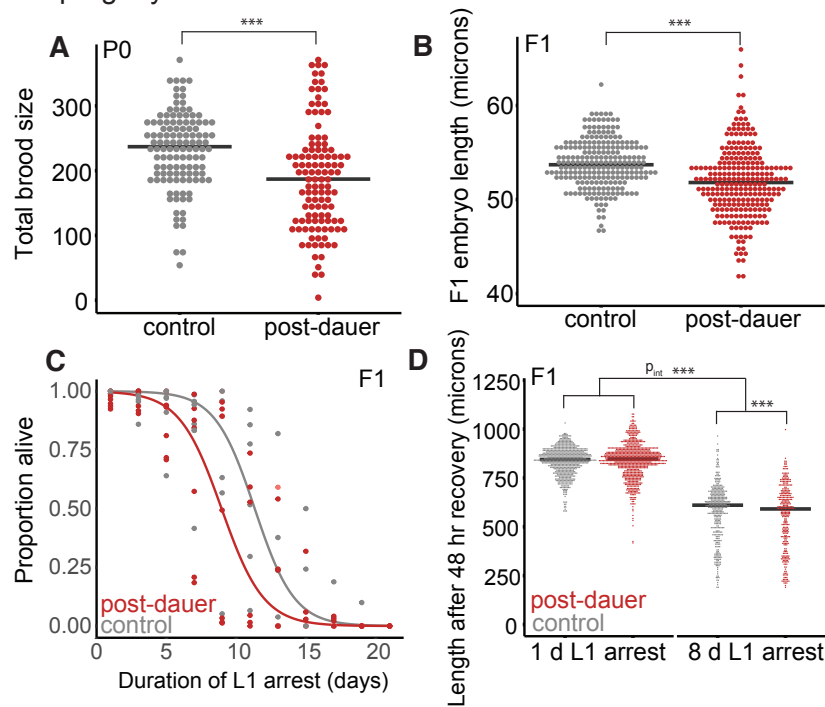

**Fig 2: Long-term dauers recover to produce fewer, smaller F1 progeny that are starvation sensitive.**

A. Brood sizes following long-term dauer diapause or control conditions. 7 biological replicates were scored with 13-18 individuals per biological replicate per condition. Effect of condition,  $p = 4.46 \times 10^{-7}$ .

B. Embryo length in the F1 progeny of post-dauers and controls. 6 biological replicates were scored with 23-70 individual embryos scored per biological replicate. Effect of condition,  $p = 9.0 \times 10^{-13}$ .

C. L1 starvation survival for 7 biological replicates of F1 progeny of post-dauers and controls. Logistic regression curves were fit, and median survival was determined for each replicate. Paired t-test on median survival,  $p = 0.10$ .

D. Worm length after 48 hr of recovery from 1 or 8 days of L1 arrest was scored in the F1 progeny of post-dauers and controls. 8 biological replicates were scored. For 1 day, 50-335 worms were scored per biological replicate; following 8 days, 7-118 worms scored per replicate. Effect of condition for 1 day,  $p = 0.95$ ; effect of condition for 8 days,  $p < 2.0 \times 10^{-16}$ . A linear mixed-effect model was fit with condition and length of starvation as fixed effects and biological replicate as a random effect. An interaction term was included for fixed effects. Effect of the interaction of condition and length of starvation,  $p = 5.1 \times 10^{-14}$ ; effect of starvation,  $p < 2.0 \times 10^{-16}$ ; effect of condition,  $p = 0.20$ .

A,B,D. Linear mixed-effect models were fit with condition (post-dauer vs. control) as a fixed effect and biological replicate as a random effect. P-values were calculated using the Wald test.

Horizontal black lines represent medians. For means of biological replicates and grand mean, see Supplementary Fig 1.

\*\*\* $p < 0.001$

564  
565  
566  
567  
568  
569  
570  
571  
572  
573  
574  
575  
576  
577  
578  
579  
580  
581  
582  
583  
584  
585  
586

Figure 3: F3 progeny of long-term dauers exhibit increased starvation resistance and lifespan

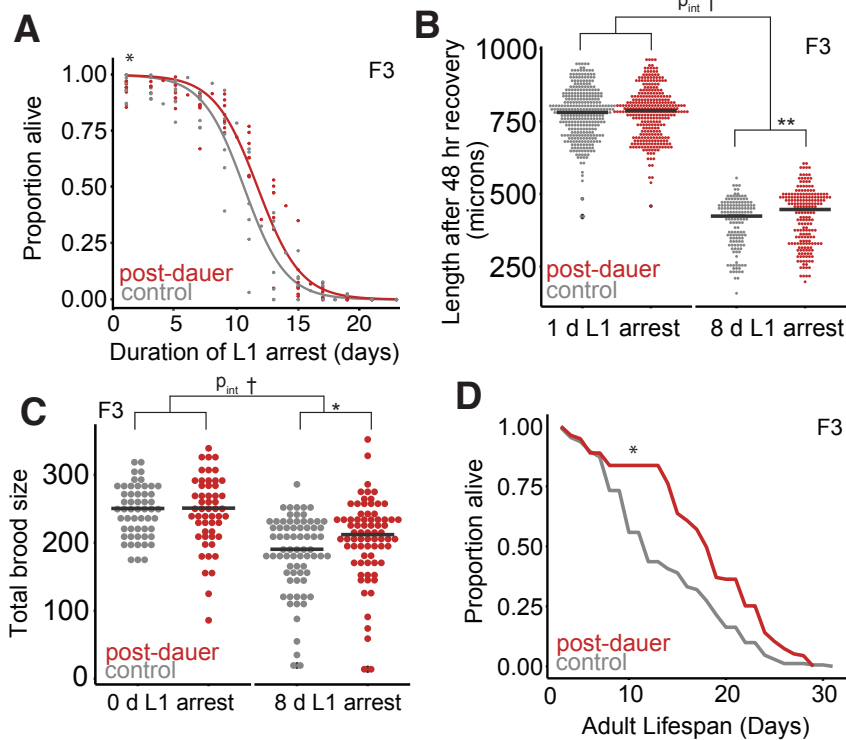

**Fig 3: F3 progeny of long-term dauers exhibit increased starvation resistance and lifespan.** A. L1 starvation survival was scored in the F3 progeny of post-dauers and controls. 8 biological replicates were scored, logistic curves were fit, and median survival times were determined. Paired t-test on median survival,  $p=0.01$ .

B. Worm body length following 48 hours of recovery from either 1 or 8 days of L1 arrest. 4 biological replicates were scored, consisting of 342 controls starved 1 day, 323 post-dauers starved 1 day, 148 controls starved 8 days, and 204 post-dauers starved 8 days. Effect of condition for 1 day,  $p = 0.25$ ; effect of condition for 8 days,  $p = 0.0048$ . Effect of the interaction between condition and length of starvation,  $p = 0.066$ ; effect of the length of starvation,  $p < 2.0 \times 10^{-16}$ ; effect of condition,  $p = 0.93$ .

C. Brood size was scored for F3 progeny of controls and post-dauers that experienced 0 or 8 days of L1 arrest. 3 biological replicates for 0 days; 5 biological replicates for 8 days. For 0 d L1 arrest, 54 controls and 53 post-dauers; for 8 d of L1 arrest, 72 controls and 74 post-dauers. Effect of condition for 0 days,  $p = 0.82$ ; effect of condition for 8 days,  $p = 0.03$ . Effect of the interaction between condition and length of starvation,  $p = 0.087$ ; effect of the length of starvation,  $p < 1.0 \times 10^{-4}$ ; effect of condition,  $p = 0.87$ .

D. Lifespans of at least 135 F3 progeny of post-dauers and controls from 3 biological replicates (See Supplementary Fig 3C-E for individual replicates). Paired t-test on the means of biological replicates,  $p = 0.026$ .

B,C. Linear mixed-effect models were fit with condition (post-dauer vs. control) as a fixed effect and biological replicate as a random effect. Next, a linear mixed-effect model was fit with condition (postdauer vs. control) and length of starvation ( 0 or 1 vs. 8 days) as fixed effects and biological replicate as a random effect. An interaction term was included for fixed effects. P-values were calculated using the Wald test.

\* $p<0.05$ , \*\* $p<0.01$ , \*\*\* $p<0.001$ ; † interaction  $p<0.1$ ; n.s. not significant. Horizontal black lines represent medians. For means of biological replicates, see Supplementary Fig 2.



587  
588  
589  
590  
591  
592  
593  
594  
595  
596  
597

Figure 4: mRNA-seq reveals relative contributions of current environment and ancestral environment in shaping gene expression variation in the F3 generation

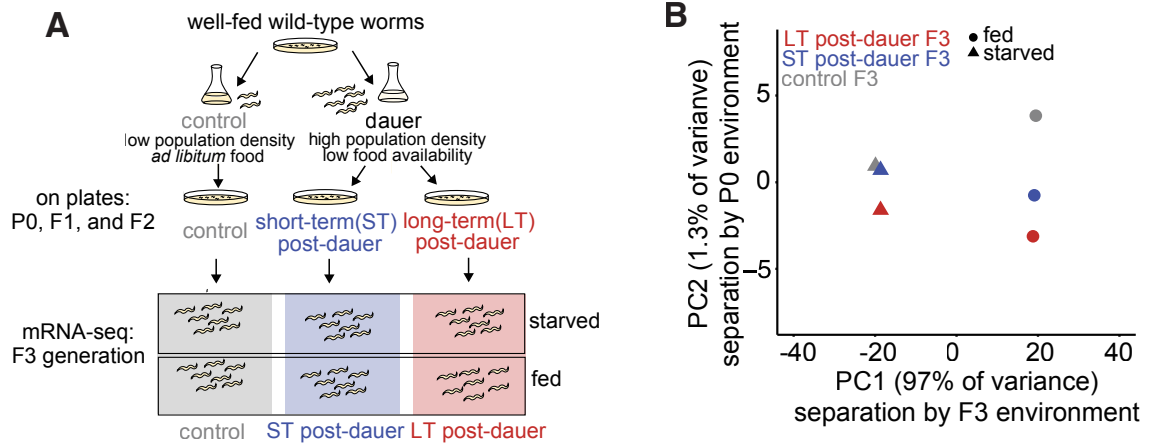

**Fig 4: mRNA-seq reveals relative contributions of current environment and ancestral environment in shaping gene expression variation.** A. Schematic of experimental set-up for collection of RNA-seq samples. B. Principal component analysis (PCA) of 6 conditions including all 8649 reliably detected genes. 97% of variance explained by whether worms were fed or starved at collection (PC1). 1.3% of variance explained by whether ancestors experienced control, short-term dauer, or long-term dauer conditions (PC2).



598  
599

Figure 5: F3 progeny of dauers exhibit reduced gene expression plasticity driven by differences in both fed and starved worms

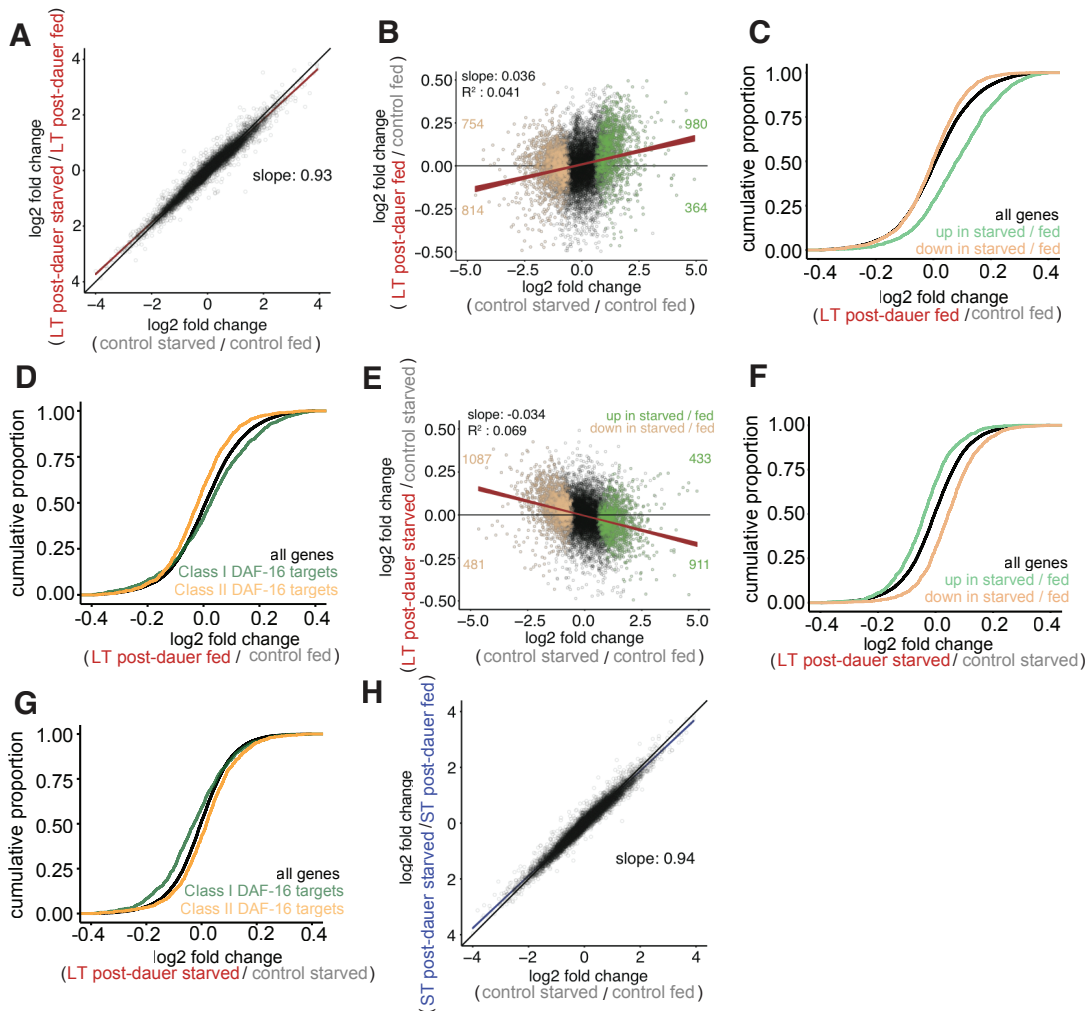

**Fig 5: F3 progeny of dauers exhibit reduced gene expression plasticity driven by differences in both fed and starved worms.**

A. Log<sub>2</sub> fold changes of all genes in control starved / control fed plotted against LT post-dauer starved / LT post-dauer fed. Red line is linear regression through all points and width indicates 95% confidence interval (CI). Black line is the line  $y = x$ . Slope is 0.93, with CI from 0.926 to 0.934.

B. Log<sub>2</sub> fold changes of all genes in control starved / control fed plotted against log<sub>2</sub> fold changes of LT post-dauer fed F3 / control fed plotted in black. Slope is significantly different from 0,  $p < 2.2 \times 10^{-16}$

C. Genes up in starved / fed:  $p = 0$ ; to genes down in starved / fed:  $p = 3.3 \times 10^{-8}$ .

D. Class I and Class II targets defined in Tepper et al. Class I targets:  $p = 1.6 \times 10^{-5}$ ; to Class II targets:  $p = 2.3 \times 10^{-11}$ .

E. Log<sub>2</sub> fold changes of all genes in control starved / control fed plotted against log<sub>2</sub> fold changes of LT post-dauer starved F3 / control starved plotted in black. Slope is significantly different from 0,  $p < 2.2 \times 10^{-16}$ .

F. Genes up in starved / fed:  $p = 0$ ; to genes down in starved / fed:  $p = 0$

G. Class I targets:  $p = 1.0 \times 10^{-12}$ ; to Class II targets:  $p = 4.0 \times 10^{-7}$ .

H. Log<sub>2</sub> fold change of all genes in control starved / control fed compared to log<sub>2</sub> fold change in ST post-dauer starved / ST post-dauer fed. Blue line indicates simple linear regression through all points, and thickness of line indicates 95% CI. Slope is 0.94, with CI from 0.936 to 0.943.

B,E. Genes up in control starved / control fed using FDR  $1 \times 10^{-10}$  are plotted in green. Genes down in control starved / control fed are plotted in tan. Red line is a simple linear regression through all points, and thickness of line indicates 95% confidence interval. Number of genes differentially expressed in control starved / control fed in each quadrant is indicated.

C,D,F,G. Within the indicated comparison, cumulative distribution functions (CDFs) of indicated gene lists are plotted. Kolmogorov-Smirnov test used to assess significance of gene list distribution compared to all genes.

600 **SUPPORTING INFORMATION**  
601

602  
603

Supplementary Fig 1: Proximal effects of long-term dauer on P0 brood size, F1 embryo length, and F1 body size

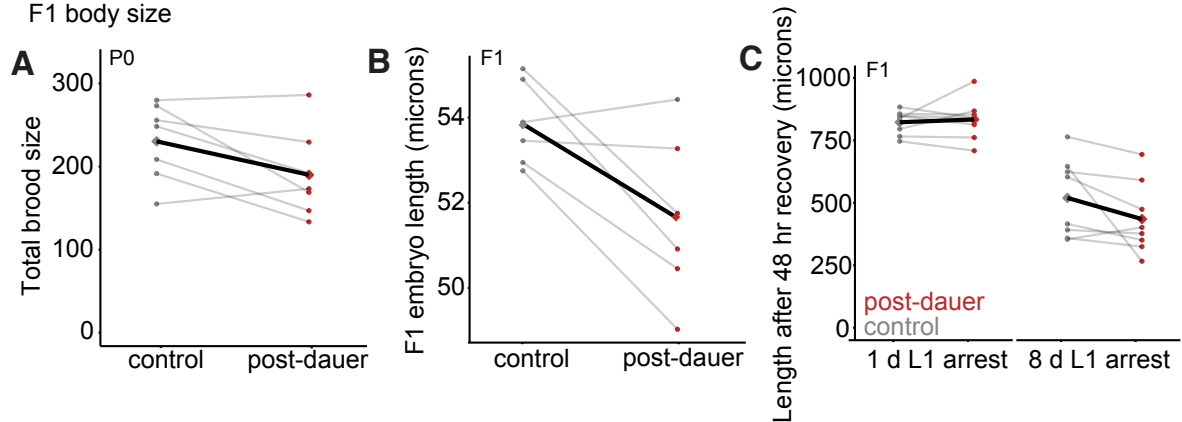

**Supplementary Fig 1: Proximal effects of long-term dauer on brood size, embryo length, and body size.** A-C. Each point represents the mean of individual worms for the indicated trait within a biological replicate. Paired replicates are connected with a gray line. Grand means are connected with a black line.

Supplementary Fig 2: Long-term dauer diapause promotes variability in F1 progeny number and size

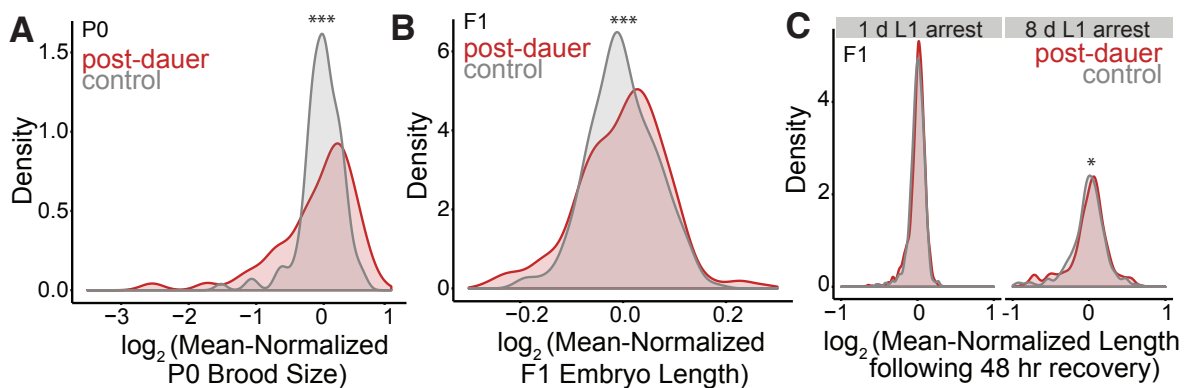

**Supplementary Fig 2: Long-term dauer diapause promotes variability in F1 progeny number and size.** A. Brood size data were pooled across 7 biological replicates including 115 post-dauer worms and 120 control worms,  $p = 2.2 \times 10^{-8}$ . B. Embryo length data were pooled across 6 replicates including 256 post-dauer embryos and 235 control embryos,  $p = 0.00033$ . C. Worm body lengths following recovery following 1 or 8 days of L1 arrest in F1 progeny of post-dauers and controls were pooled from 8 biological replicates including 748 controls starved for 1 day, 897 post-dauers starved for 1 day, 421 controls starved for 8 days, and 337 post-dauers starved for 8 days. For 1 day,  $p = 0.13$ ; for 8 days,  $p = 0.02$ . A-C. Trait values for individual post-dauer and control worms were mean-normalized to the mean trait value for the corresponding post-dauer condition and replicate. Data were pooled across biological replicates. Levene's test was used to assess differences in variance. \* $p < 0.05$ , \*\*\* $p < 0.001$

604  
605

Supplementary Fig 3: Transgenerational effects of long-term dauer diapause in the F3 generation

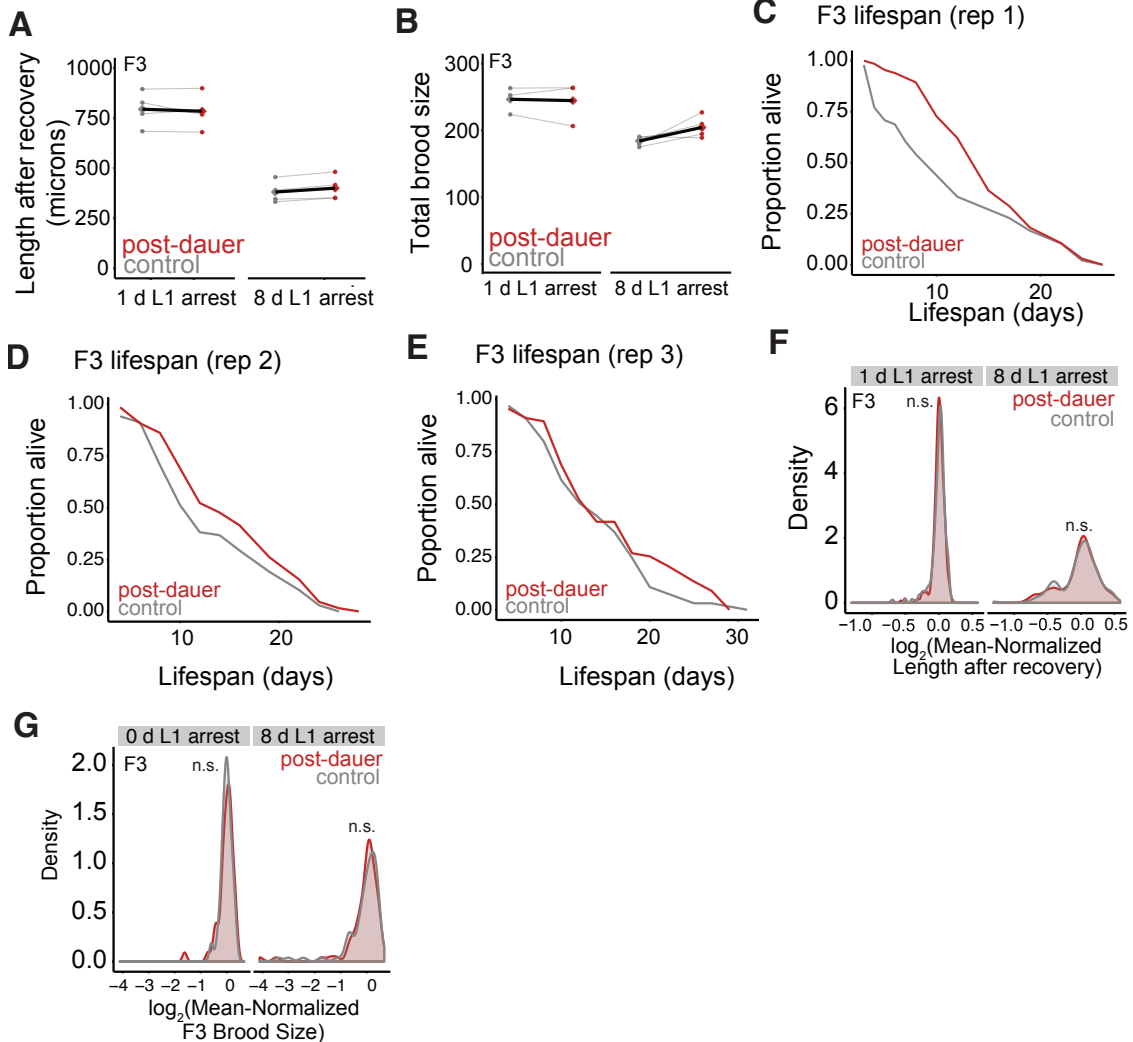

**Supplementary Fig 3: Transgenerational effects of long-term dauer diapause in the F3 generation.** A-B. Each point represents the mean of individual worms in the F3 generation for the indicated trait within a biological replicate. Paired replicates are connected with a gray line. Grand means are connected with a black line.  
 C. Replicate 1 of post-dauer and control F3 lifespan. 47 control and 66 post-dauer F3 worms assayed. Control mean: 12.1 days; post-dauer mean: 15 days  
 D. Replicate 2 of post-dauer and control F3 lifespan. 64 control and 64 post-dauer F3 worms assayed. Control mean: 13.6 days; post-dauer mean: 15.5 days  
 E. Replicate 3 of post-dauer and control F3 lifespan. 63 control and 64 post-dauer F3 worms assayed. Control mean: 14.4 days; post-dauer mean: 16.2 days  
 F. Worm body length measurements were pooled across replicates to test for differences in variance (same data as 3B), For 1 day,  $p = 0.089$ ; for 8 days,  $p = 0.82$   
 G. Brood sizes data were pooled across replicates to test for differences in variance (same data as Fig 3C). For 0 d:  $p = 0.18$ ; for 8 d:  $p = 0.48$ .  
 F-G. Trait values for individual post-dauer and control worms were mean-normalized to the mean trait value for the corresponding condition and replicate. Data were pooled across biological replicates. Levene's test was used to assess differences in variance.  
 n.s. not significant

606  
607

Supplementary Fig 4: Transgenerational starvation resistance is not apparent in the F3 generation following short-term dauer diapause

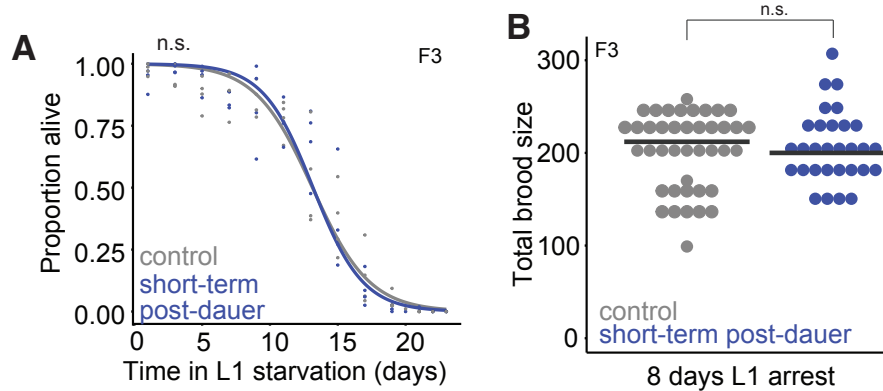

**Supplementary Fig 4: Transgenerational starvation resistance is not apparent in the F3 generation following short-term dauer diapause.** A. Starvation survival in the F3 progeny of controls and short-term dauers (6 days as a dauer). 4 biological replicates were scored, logistic curves were fit to data, and median survival times were determined. Paired t-test on median half-lives,  $p = 0.73$ . B. Brood size of F3 progeny of controls and short-term dauers was scored after worms experienced 8 days of L1 arrest. 3 biological replicates of 5-18 individual worms per condition were scored. Grand mean for control: 200; for post-dauers: 201. A linear mixed-effect model was fit to brood size data with condition (post-dauer vs. control) as a fixed effect and biological replicate as a random effect. P-values were calculated using the Wald test. Effect of condition,  $p = 0.75$ . n.s.: not significant. Horizontal black lines represent median.

Supplementary Figure 5: Individual replicates separate on PCA

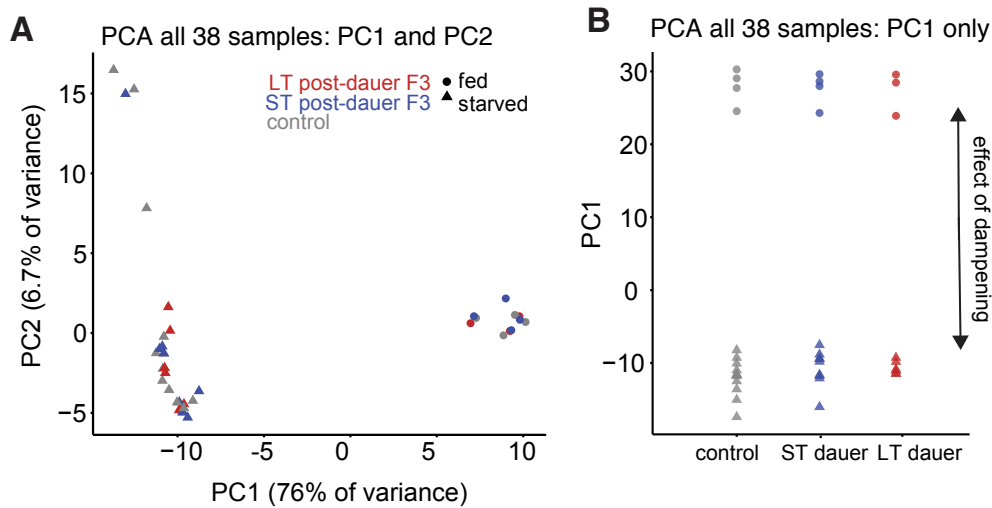

**Supplementary Fig 5: Individual replicates separate on PCA.** A. Principal component analysis (PC1 and PC2) of all biological replicates included in differential expression analysis. B. Biological replicates plotted in PC1 only. Considering both current environment (fed vs. starved) and ancestral environment (control, short-term dauer, and long-term dauer) as factors, both effects are significant in a multivariate ANOVA using Wilks' Lambda for PC1. Effect of current environment,  $p < 2.2 \times 10^{-16}$ ; effect of ancestral environment,  $p = 0.00022$ .

608

Supplementary Figure 6: Additional RNA-seq analysis

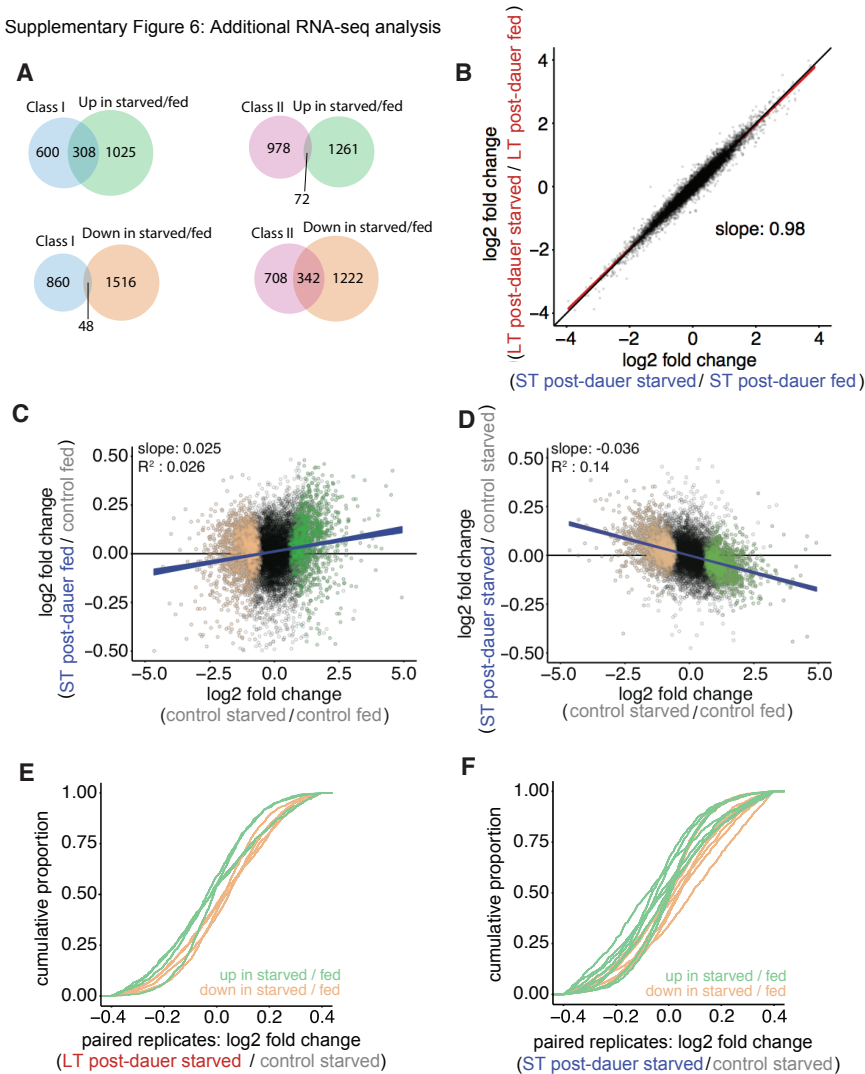

**Supplementary Fig 6: Additional RNA-seq analysis.** A. Class I and Class II targets defined as genes positively or negatively regulated by DAF-16. Class I and Class II targets were filtered to include those with FDR < 0.05 that were also in the background set of 8649 genes included in starved / fed differential expression analysis. Class I targets are over-enriched in genes up in starved / fed (hypergeometric  $p = 1 \times 10^{-49}$ ). Class II targets are over-enriched among genes in starved / fed (hypergeometric  $p = 2.6 \times 10^{-34}$ ). Class I targets can explain 23.1% of starvation upregulation; class II targets can explain 21.9% of starvation downregulation.

B. Log<sub>2</sub> fold change of all genes in ST post-dauer starved / ST post-dauer fed compared to log<sub>2</sub> fold change in LT post-dauer starved / LT post-dauer fed. Red line indicates simple linear regression through all points, and thickness of line indicates 95% confidence interval. Slope is 0.98, with confidence interval ranging from 0.973 to 0.981.

C-D. Genes up in control starved / control fed using FDR <  $1 \times 10^{-10}$  are plotted in green. Genes down in control starved / control fed are plotted in tan. Blue line is a simple linear regression through all points, and thickness of line indicates confidence interval.

C. Log<sub>2</sub> fold changes of all genes in control starved / control fed plotted against log<sub>2</sub> fold changes of ST post-dauer fed F3 / control fed plotted in black.

D. Log<sub>2</sub> fold changes of all genes in control starved / control fed plotted against log<sub>2</sub> fold changes of ST post-dauer starved F3 / control starved plotted in black.

E-F. Cumulative distribution function plots for individual paired replicates using the same groups of genes defined as up- and down-regulated in control starved / control fed comparison. Paired t-test on median fold changes for these two gene groups.

E. LT post-dauer starved / control starved comparison,  $p = 0.0083$ .

F. ST post-dauer starved / control starved comparison,  $p = 0.088$ .

609 **Supplementary Table 1: Starvation survival and lifespan statistics**

| <b>Starvation survival</b>                        |                                   |                     |          |                                             |                                                   |                            |
|---------------------------------------------------|-----------------------------------|---------------------|----------|---------------------------------------------|---------------------------------------------------|----------------------------|
| <b>F1 progeny of long-term dauer and control</b>  | <b>Avg median survival (days)</b> | <b>StDev (days)</b> | <b>n</b> | <b>Avg delta compared to control (days)</b> | <b>StDev of deltas compared to control (days)</b> | <b>p-value vs. control</b> |
| Control                                           | 11                                | 3                   | 7        | N/A                                         | N/A                                               | N/A                        |
| Long-term dauer                                   | 9.1                               | 3.1                 | 7        | -1.9                                        | 2.6                                               | 0.11                       |
| <b>F3 progeny of long-term dauer and control</b>  | <b>Avg median survival (days)</b> | <b>StDev (days)</b> | <b>n</b> | <b>Avg delta compared to control (days)</b> | <b>StDev of deltas compared to control (days)</b> | <b>p-value vs. control</b> |
| Control                                           | 10.5                              | 1.1                 | 8        | N/A                                         | N/A                                               | N/A                        |
| Long-term dauer                                   | 11.9                              | 0.6                 | 8        | 1.4                                         | 1.1                                               | 0.01                       |
| <b>F3 progeny of short-term dauer and control</b> | <b>Avg median survival (days)</b> | <b>StDev (days)</b> | <b>n</b> | <b>Avg delta compared to control (days)</b> | <b>StDev of deltas compared to control (days)</b> | <b>p-value vs. control</b> |
| Control                                           | 13.3                              | 1.6                 | 4        | N/A                                         | N/A                                               | N/A                        |
| Short-term dauer                                  | 13.3                              | 1.5                 | 4        | 0.08                                        | 0.4                                               | 0.73                       |
| <b>Lifespan</b>                                   |                                   |                     |          |                                             |                                                   |                            |
| <b>F3 progeny of long-term dauer and control</b>  | <b>Avg median lifespan (days)</b> | <b>StDev (days)</b> | <b>n</b> | <b>Avg delta compared to control (days)</b> | <b>StDev of deltas compared to control (days)</b> | <b>p-value vs. control</b> |
| Control                                           | 13.4                              | 1.2                 | 3        | N/A                                         | N/A                                               | N/A                        |
| Long-term dauer                                   | 15.6                              | 0.6                 | 3        | 2.2                                         | 0.6                                               | 0.02                       |

610

611 **Supplementary File 1: edgeR output for pairwise RNA-seq comparisons (.xlsx file)**

612 **SUPPLEMENTARY DISCUSSION**

613 ***Increased phenotypic variation after long-term dauer diapause***

614 In addition to long-term post-dauer worms producing fewer, smaller, starvation-sensitive  
615 F1 progeny, there is also greater inter-individual variation in P0 brood size and F1 progeny size.  
616 Greater inter-individual variability could occur as a result of 1) decanalization or 2) an  
617 evolutionary bet-hedging strategy (52). Decanalization occurs when phenotypic robustness is  
618 compromised, as a consequence of, for example, conditions that result in pathology. We believe  
619 the observed decreases in average P0 brood size and F1 progeny size and starvation  
620 resistance following long-term dauer arrest reflect pathological consequences of extended  
621 starvation exceeding the buffering capacity of the organism. Consistent with this interpretation,  
622 appreciable lethality and developmental abnormalities affecting the reproductive system have  
623 been reported after 60 and 25 days of dauer arrest, respectively (31, 32). Alternatively, bet  
624 hedging is thought to be evolutionarily adaptive in unpredictable environments (53). In a bet-  
625 hedging scenario, an isogenic population exhibits inter-individual variability such that it is suited  
626 for variable environmental conditions. In a particular condition, the bet-hedging population may  
627 be less fit than a highly specialized population. However, the bet-hedging population reduces  
628 variation in fitness across environments. If post-dauer worms display a bet-hedging strategy,  
629 then a subpopulation of post-dauers would be expected to perform better than controls in at  
630 least some environmental condition. Our data do not provide compelling evidence for a sub-  
631 population of post-dauers or their progeny that performs better than controls for any of the  
632 proximal traits assayed, despite increased variability. However, we cannot formally exclude the  
633 possibility that there are other environmental conditions that would reveal an advantage to  
634 increased phenotypic variation as a consequence of extended dauer diapause. We also  
635 emphasize that this consideration of bet hedging is in the context of proximal traits. Since we  
636 found that the great-grandprogeny of long-term dauers survive starvation better, it is possible

637 that any advantage to a bet-hedging strategy is only apparent on the scale of multiple

638 generations.

639
